# Supplementary material for: Conceptual models of dissolved carbon fluxes in a two-layer stratified lake: interannual typhoon responses under extreme climates
Source: Copernicus journal article supplement (doi:10.5194/bg-20-4359-2023), 2023-10-25
Supplement: Supplementary file 1 [file bg-20-4359-2023-supplement.pdf]

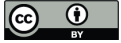

*Supplement of*

## **Conceptual models of dissolved carbon fluxes in a two-layer stratified lake: interannual typhoon responses under extreme climates**

**Hao-Chi Lin et al.**

*Correspondence to:* Keisuke Nakayama ([nakayama@phoenix.kobe-u.ac.jp](mailto:nakayama@phoenix.kobe-u.ac.jp))

The copyright of individual parts of the supplement might differ from the article licence.

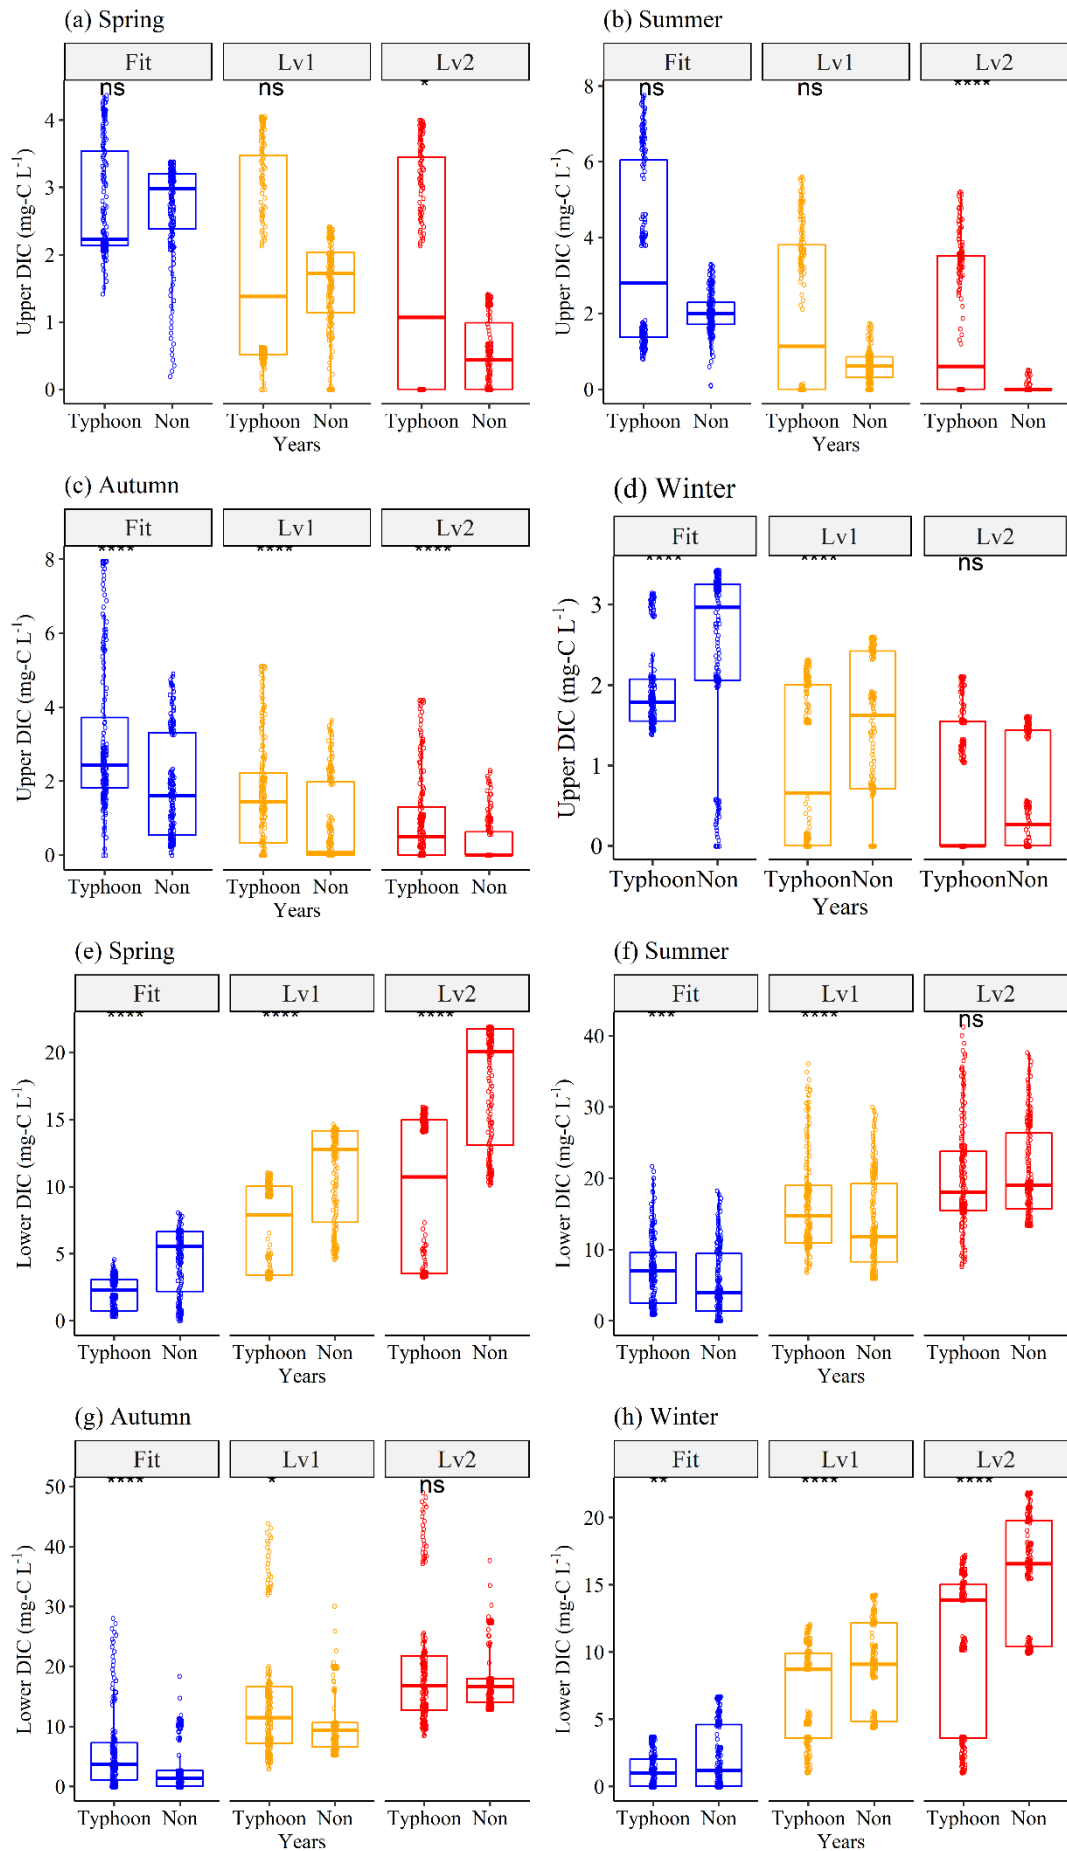

**Fig. S1.** Seasonal responses of continuous **(a-d)** upper layer DIC and **(e-h)** lower layer DIC ( $\text{mg-C L}^{-1}$ ) between typhoon (*Typhoon*) and non-typhoon (*Non*) years for each season as in **Fig. 3**. *Fit* (blue boxes) condition shows the best-fit data by using the conceptual two-layer C model; *Lv1* (yellow boxes) and *Lv2* (red boxes) show the extreme climates. Empty dots show the continuous DIC and DOC data. “ns”: *p*-values  $\geq 0.05$ ; \*: *p*-values from 0.05 to 0.01; \*\*: *p*-values from 0.01 to 0.001; \*\*\*\*: *p*-values less than 0.0001 based on a *t*-test.

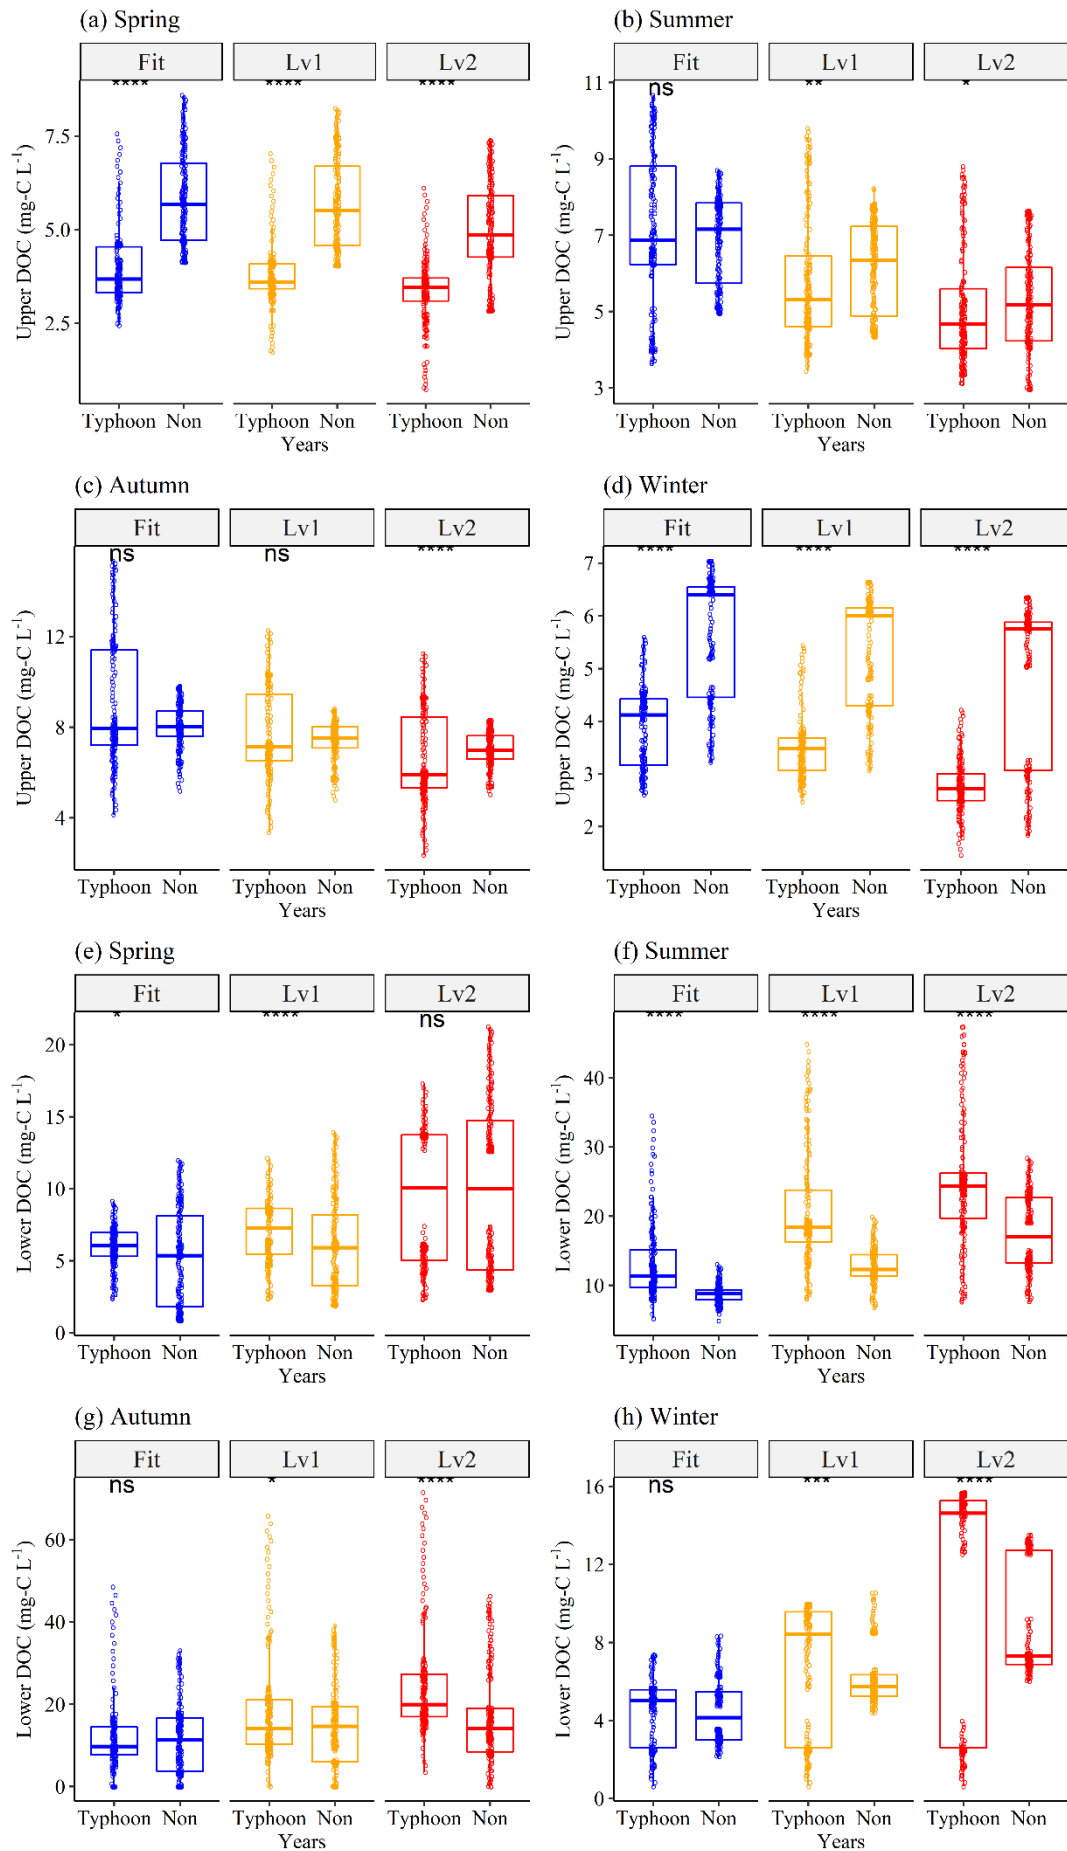

**Fig. S2.** Seasonal responses of **(a-d)** upper layer DOC and **(e-h)** lower layer DOC ( $\text{mg-C L}^{-1}$ ) between typhoon (*Typhoon*) and non-typhoon (*Non*) years for each season as in Fig. 7. The *Fit* (blue boxes) condition shows the best-fit data by using the conceptual two-layer carbon model; *Lv1* (yellow boxes) and *Lv2* (red boxes) show the extreme climates. Empty dots show the continuous DIC and DOC data. “ns”:  $p$ -values  $\geq 0.05$ ; \*:  $p$ -values from 0.05 to 0.01; \*\*:  $p$ -values from 0.01 to 0.001; \*\*\*\*:  $p$ -values less than 0.0001 based on a  $t$ -test.
